# Supplementary material
Source: MDPI journal article supplement (https://www.mdpi.com/2227-9040/11/1/28)
Supplement: s1 [file s1 › chemosensors-2086809-supplementary.pdf]

*Supplementary Material*

# Scanning Electron Microscopy and Raman Spectroscopy characterization of Structural Changes Induced by Thermal Treatment in Innovative Bio-Based Polyamide Nanocomposites

Ioana Andreea Brezeştean<sup>1,2</sup>, Daniel Marconi<sup>1</sup>, Alia Colniţă<sup>1</sup>, Alexandra Ciorîţă<sup>1</sup>, Septimiu Cassian Tripon<sup>1</sup>, Zina Vuluga<sup>3</sup>, Mihai Cosmin Corobea<sup>3</sup>, Nicoleta Elena Dina<sup>1\*</sup> and Ioan Turcu<sup>1</sup>

<sup>1</sup> Department of Molecular and Biomolecular Physics, National Institute for Research and Development of Isotopic and Molecular Technologies, 67-103 Donath, 400296, Cluj-Napoca, Romania

<sup>2</sup> Department of Biomolecular Physics, Babeş-Bolyai University, Faculty of Physics, Kogălniceanu 1, 400084, Cluj-Napoca, Romania

<sup>3</sup> Department of Polymers National Institute for Research and Development in Chemistry and Petrochemistry-ICECHIM, 202 Spl. Independenţei, 060021, Bucharest, Romania

## *Thermogravimetric analysis data*

### Operation parameters:

Instrument: Q5000IR (TA Instruments)  
Sample size: 5 - 15 mg  
Sample Pan: Platinum 100µL  
Purge Gas 1: Nitrogen (99.999%) 50 ml/min  
Purge Gas 2: Air (99.999%) 50 ml/min  
Method: 1) Ramp 10°C/min to 700°C;  
2) Select gas 2;  
3) Isothermal for 5min.

Tmax (°C) = T(dα/dt)max

RT (Room Temperature) = 25 - 40°C

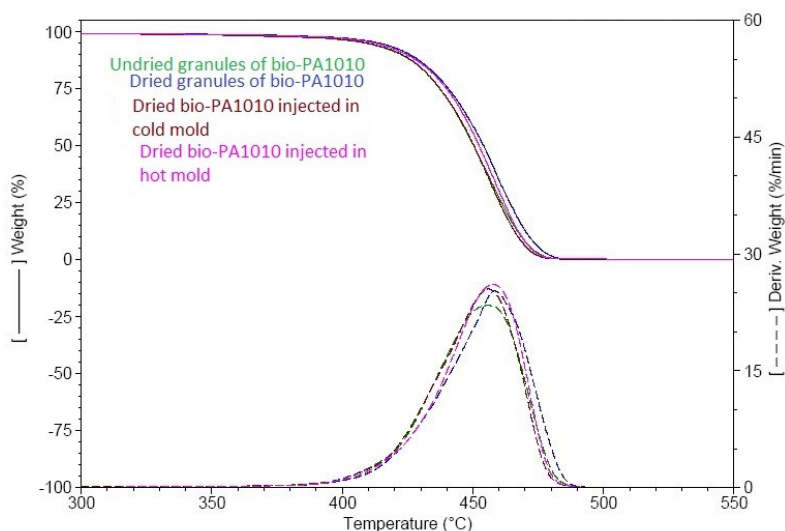

**Figure S1.** Thermogravimetric analysis showing the thermal stability for bio-PA1010 granules in undried and dried state, and for the bio-PA1010 injected in cold and hot mold, respectively.

TGA analysis for bio-PA1010 was performed on dry and non-dried bio-PA1010 granules, as well as on samples injected into cold and hot molds. It can be observed that the thermal stability of bio-PA1010 is very little influenced by drying or by injection into a hot or cold mold. Bio-PA1010 has a very good thermal stability. Up to 200°C it loses approx. 0.5% of the mass, and 5% is lost only in the range of 209-214°C. The maximum speed of decomposition is recorded at 455-458°C.

**Table S1.** Table containing main parameters monitored during thermogravimetric analysis (weight loss, temperature of onset and the residues at 700°C).

|                                        | RT - 200°C | Wt loss 5%      | Onset Point |        | T(da/dt)max | Residue at 700°C |      |
|----------------------------------------|------------|-----------------|-------------|--------|-------------|------------------|------|
|                                        | Wt. loss   | T <sub>5%</sub> | Wt.         | Tonset | Tmax        | N <sub>2</sub>   | Air  |
|                                        | %          | °C              | %           | °C     | °C          | %                | %    |
| Undried granules of bio-PA1010         | 0.45       | 409.1           | 99.34       | 429.1  | 455.6       | 0.08             | 0.03 |
| Dried granules of bio-PA1010           | 0.38       | 414.4           | 99.55       | 433.8  | 458.4       | 0.14             | 0.00 |
| Dried bio-PA1010 injected in cold mold | 0.48       | 409.5           | 99.33       | 430.9  | 455.8       | 0.04             | 0.00 |
| Dried bio-PA1010 injected in hot mold  | 0.45       | 412.6           | 99.42       | 433.3  | 457.6       | 0.24             | 0.05 |

### *Raman analysis data*

**Table S2. Tables containing Raman intensities ratios specific to bio-PA1010 filled with LDH and C500, respectively.**

| bio-PA1010 with LDH untreated | bio-PA1010 with LDH 80°C    | bio-PA1010 with LDH 145°C    |
|-------------------------------|-----------------------------|------------------------------|
| $I_{1433}/I_{1633} = 1.823$   | $I_{1433}/I_{1633} = 1.585$ | $I_{1433}/I_{1633} = 1.235$  |
| $I_{1433}/I_{650} = 2.058$    | $I_{1433}/I_{650} = 1.367$  | $I_{1433}/I_{650} = 0.732$   |
| $I_{2846}/I_{1633} = 0.791$   | $I_{2846}/I_{1633} = 0.581$ | $I_{2846}/I_{1633} = 0.1645$ |
| $I_{2885}/I_{1633} = 0.758$   | $I_{2885}/I_{1633} = 0.557$ | $I_{2885}/I_{1633} = 0.157$  |
| $I_{2846}/I_{650} = 0.89$     | $I_{2846}/I_{650} = 0.51$   | $I_{2846}/I_{650} = 0.097$   |
| $I_{2885}/I_{650} = 0.853$    | $I_{2885}/I_{650} = 0.481$  | $I_{2885}/I_{650} = 0.093$   |
| $I_{850}/I_{650} = 1.175$     | $I_{850}/I_{650} = 1.02$    | $I_{850}/I_{650} = 0.919$    |
| $I_{1053}/I_{1633} = 1.265$   | $I_{1053}/I_{1633} = 1.303$ | $I_{1053}/I_{1633} = 1.3715$ |
| $I_{1053}/I_{650} = 1.423$    | $I_{1053}/I_{650} = 1.124$  | $I_{1053}/I_{650} = 0.8132$  |

| bio-PA1010 with C500 untreated | bio-PA1010 with C500 at 80°C | bio-PA1010 with C500 at 145°C |
|--------------------------------|------------------------------|-------------------------------|
| $I_{1433}/I_{1633} = 1.08$     | $I_{1433}/I_{1633} = 0.995$  | $I_{1433}/I_{1633} = 1.29$    |
| $I_{1433}/I_{650} = 2.15$      | $I_{1433}/I_{650} = 2.068$   | $I_{1433}/I_{650} = 2.02$     |
| $I_{2846}/I_{1633} = 3.936$    | $I_{2846}/I_{1633} = 1.901$  | $I_{2846}/I_{1633} = 0.519$   |
| $I_{2885}/I_{1633} = 3.831$    | $I_{2885}/I_{1633} = 1.7960$ | $I_{2885}/I_{1633} = 0.431$   |
| $I_{2846}/I_{650} = 7.815$     | $I_{2846}/I_{650} = 3.718$   | $I_{2846}/I_{650} = 0.816$    |
| $I_{2885}/I_{650} = 7.606$     | $I_{2885}/I_{650} = 3.732$   | $I_{2885}/I_{650} = 0.677$    |
| $I_{850}/I_{650} = 1.082$      | $I_{850}/I_{650} = 1.228$    | $I_{850}/I_{650} = 1.082$     |
| $I_{1053}/I_{1633} = 0.733$    | $I_{1053}/I_{1633} = 0.724$  | $I_{1053}/I_{1633} = 0.842$   |
| $I_{1053}/I_{650} = 1.456$     | $I_{1053}/I_{650} = 1.505$   | $I_{1053}/I_{650} = 1.323$    |
